# Supplementary material for: Mitochondrial impairment triggers cytosolic oxidative stress and cell death following proteasome inhibition
Source: PubMed Central journal article supplement — Sci Rep. 2014 Jul 31;4:5896. doi: 10.1038/srep05896 (PMC4116626; doi:10.1038/srep05896), 2014-07-31

## Supplementary Information

### **Mitochondrial impairment triggers cytosolic oxidative stress and cell death following proteasome inhibition**

Sunita Maharjan<sup>1</sup>, Masahide Oku<sup>1</sup>, Masashi Tsuda<sup>1</sup>, Jun Hoseki<sup>2</sup> & Yasuyoshi Sakai<sup>1,2</sup>

<sup>1</sup>Division of Applied Life Sciences, Graduate School of Agriculture, Kyoto University, Kyoto 606-8502, Japan, <sup>2</sup>Research Unit for Physiological Chemistry, the Center for the Promotion of Interdisciplinary Education and Research, Kyoto University, Kyoto 606-8502, Japan.

#### **Figure S1 | Polyubiquitinated proteins accumulate under proteasome inhibition.**

Immunoblot of polyubiquitinated proteins using anti-ubiquitin antibody. Samples were 1% NP-40 lysates of CHO cells treated with either DMSO (control) or 1  $\mu$ M bortezomib (Bort) for 8 h at 37°C.

#### **Figure S2 | Resveratrol reduces cytosolic ROS and improves cell viability under proteasome inhibition.**

(A) Relative cell viability as determined by the MTT assay. (B) Cytosolic H<sub>2</sub>O<sub>2</sub> detection using HyPer under proteasome inhibition. 200  $\mu$ M H<sub>2</sub>O<sub>2</sub> was used as a positive control. Quantitated values are shown as the means  $\pm$  s.e.m. of three independent measurements. \*\*:  $p < 0.01$ , \*:  $p < 0.05$ .

#### **Figure S3 | Sesamin functions as a redox modulator in cells under proteasome inhibition.**

(A) FRET analysis of CHO cells expressing Redoxfluor, (C) cytosolic ROS detection using CM-H<sub>2</sub>DCFDA, (D) mitochondrial membrane potential detection using Mitotracker® Red CMXRos, and (E) mitochondrial ROS detection using the MitoSOX Red probe, after treatment with DMSO (control), 1  $\mu$ M bortezomib (Bort), or simultaneous treatment with 1  $\mu$ M bortezomib and 10  $\mu$ M sesamin (Bort + Ses). Rotenone was used as a positive control for mitochondrial dysfunction and ROS generation. Fluorescence images (left panel) and quantitated fluorescence intensities (right panel) are shown. (B) Relative cell viability as determined by the MTT assay. All treatments were done for 8 h. Quantitated values are shown as the means  $\pm$  s.e.m. of three independent measurements. \*\*:  $p < 0.01$ , \*:  $p < 0.05$ .

#### **Figure S4 | Ascorbic acid did not affect cytosolic redox state in cells under proteasome inhibition.**

FRET images of CHO cells expressing Redoxfluor (upper panel) and quantitated fluorescence intensities (lower panel) are shown. Treatments were done for 8 h. Quantitated values are shown as the means  $\pm$  s.e.m. of three

independent measurements. \*\*:  $p < 0.01$ , NS: not significant.

**Figure S5 | SOD expression and cellular localization.** (A) Anti-MnSOD immunoblot of 1% NP-40 lysates from CHO cells transfected with either MnSOD construct or empty vector (pcDNA3.1). (B) Mitochondrial localization of overexpressed MnSOD. Immunofluorescence staining of CHO cells transfected with MnSOD. White arrows indicate MnSOD-overexpressing cells. (C) Mitochondrial ROS detection using the MitoSOX Red probe in cells transfected with pcDNA3.1 (mock) after treatment with DMSO (Mock + DMSO), cells transfected with pcDNA3.1 (mock) after treatment with 10  $\mu$ M MG132 (Mock + MG132), and cells transfected with MnSOD after treatment with 10  $\mu$ M MG132 (MnSOD + MG132). Under all conditions, cells were transiently transfected with respective plasmids. Fluorescence images (upper panel) and quantitated fluorescence intensities (lower panel) are shown. (D) Anti-HA immunoblot of 1% NP-40 lysates from CHO cells transfected with either HA-SOD1 construct or empty vector (pcDNA3.1).

**Figure S6 | Validation of light mitochondrial fraction and ubiquitin localization under proteasome inhibition.** (A) Validation of the light mitochondrial fractionation under DMSO (control) and 10  $\mu$ M MG132 (MG132) treatment along with whole cell extract using a mitochondrial marker (anti-VDAC1), a cytosolic marker (anti-GAPDH), an endoplasmic reticulum marker (Anti-ERp72), and a peroxisome marker (Anti-catalase) (B) Localization of overexpressed HA-Ub. Immunofluorescence staining of CHO cells transfected with HA-Ub after treatment with DMSO (HA-Ub+DMSO), 1  $\mu$ M Bortezomib (HA-Ub+Bort) and 10  $\mu$ M MG132 (HA-Ub+MG132) respectively.

**Figure S1**

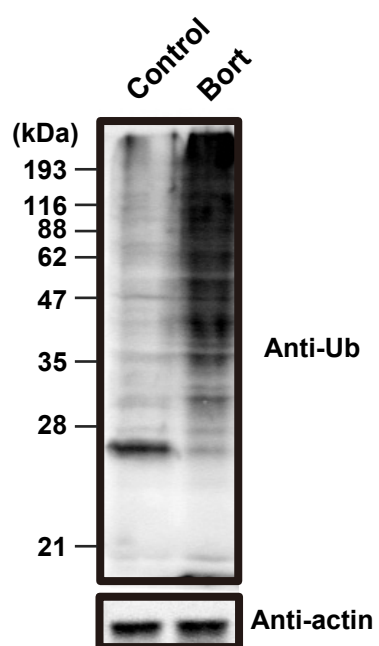

**Figure S2**

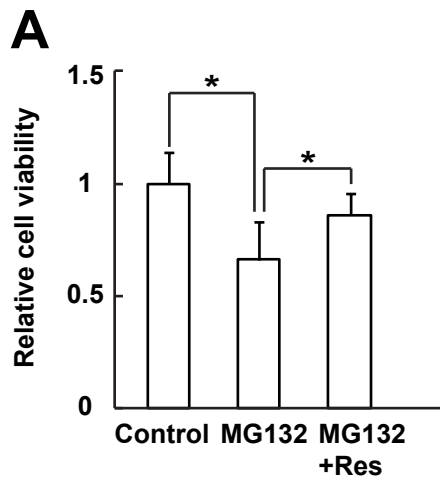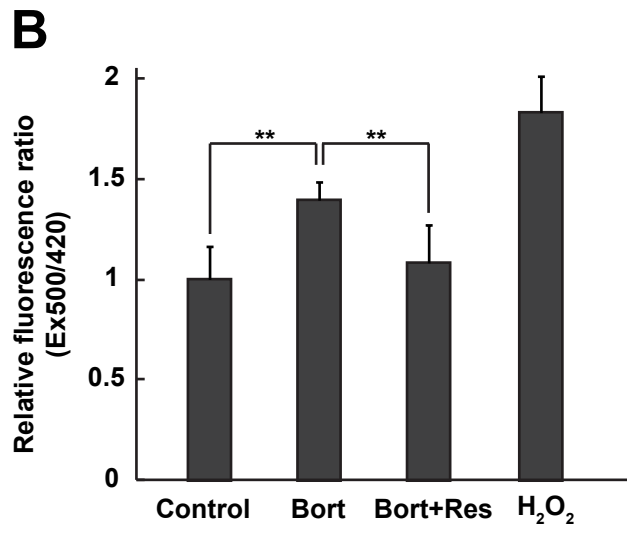



# Figure S3

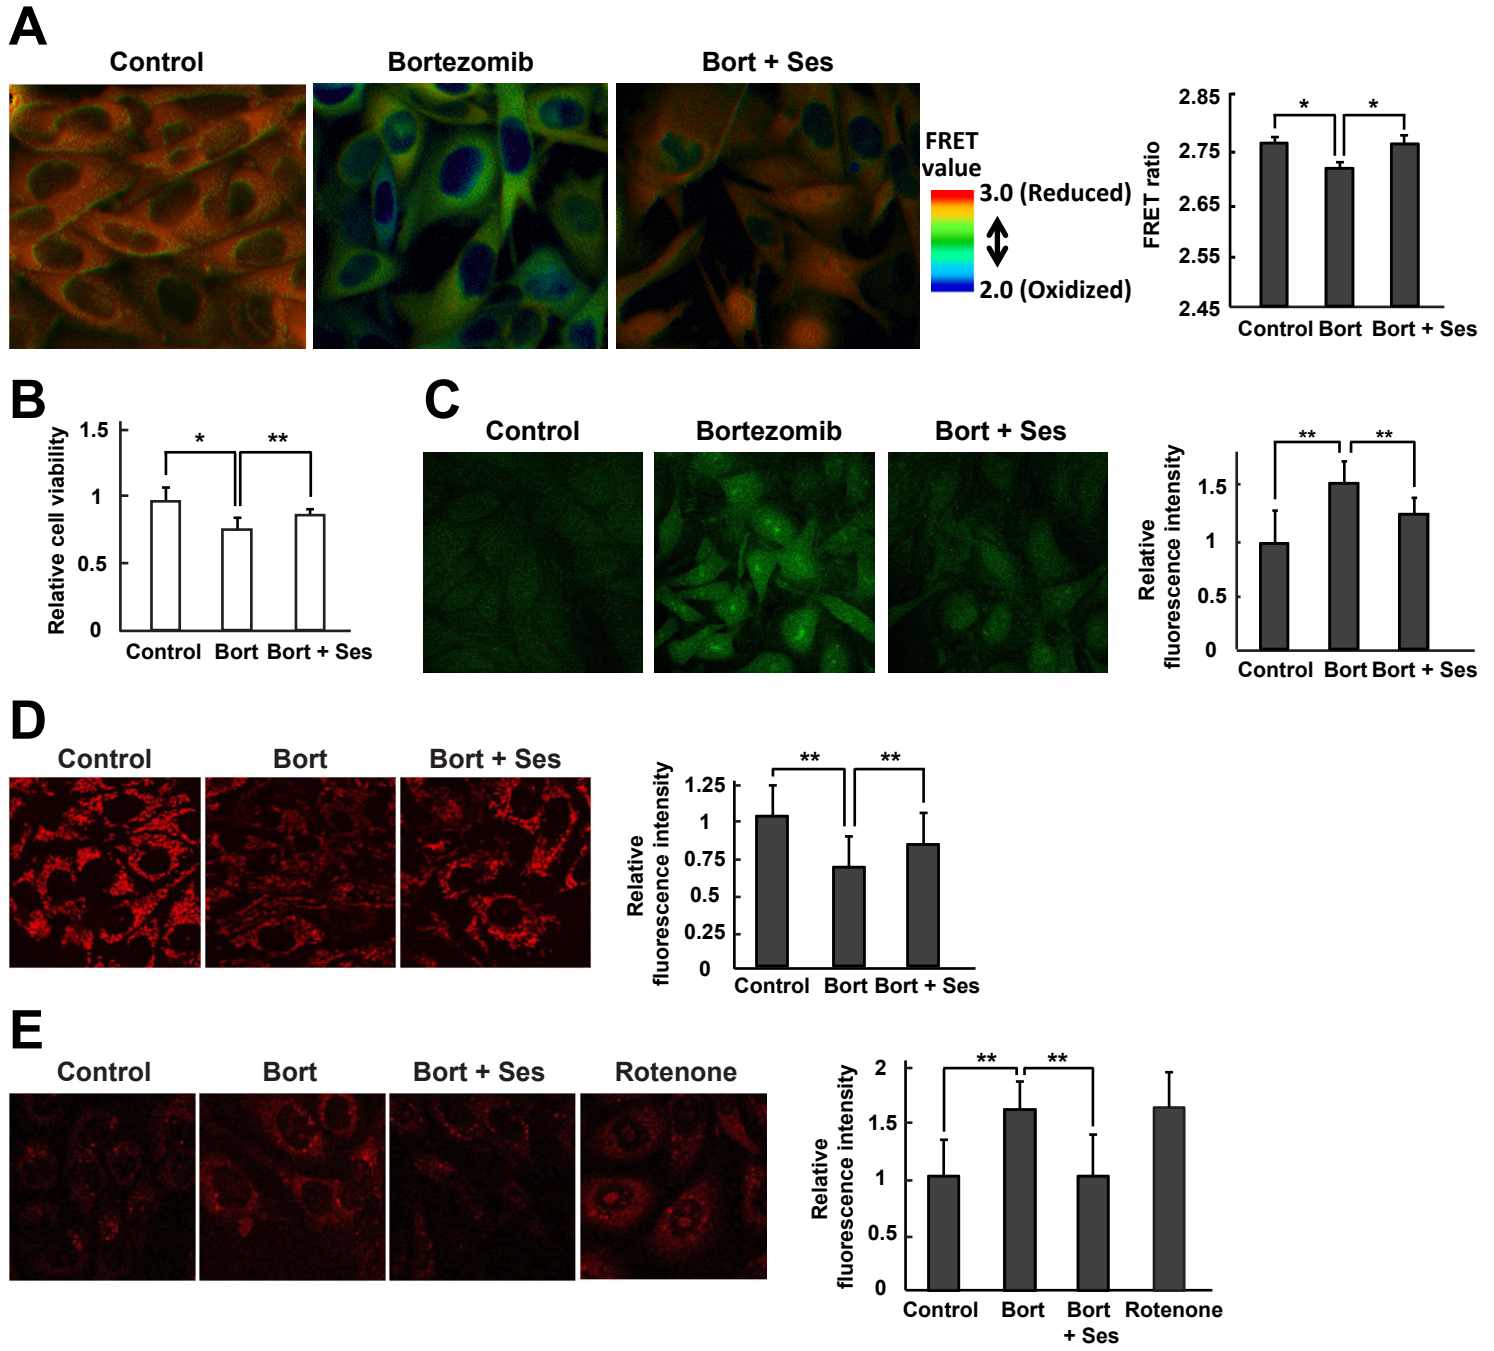

# Figure S4

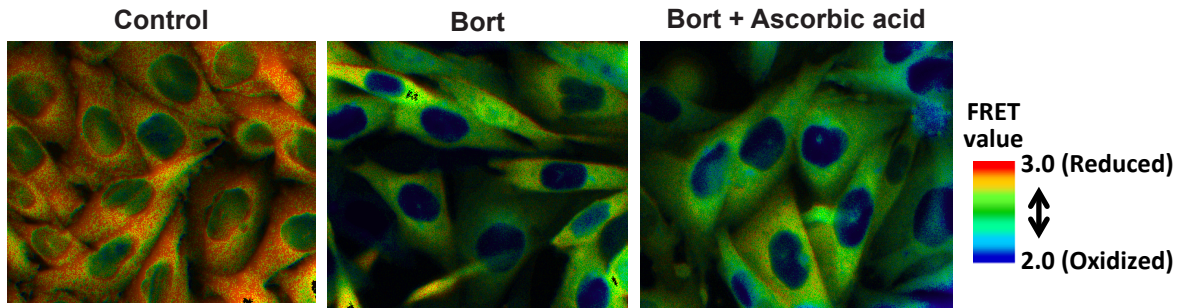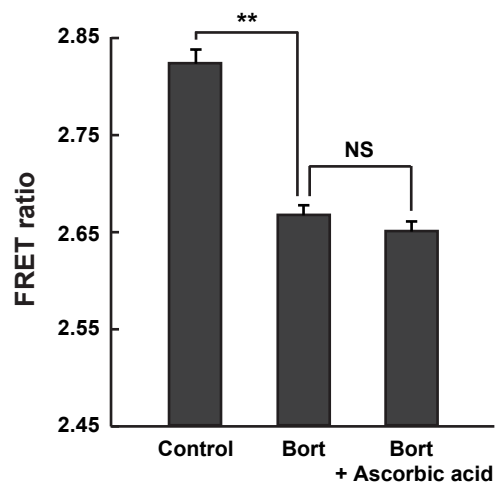

# Figure S5

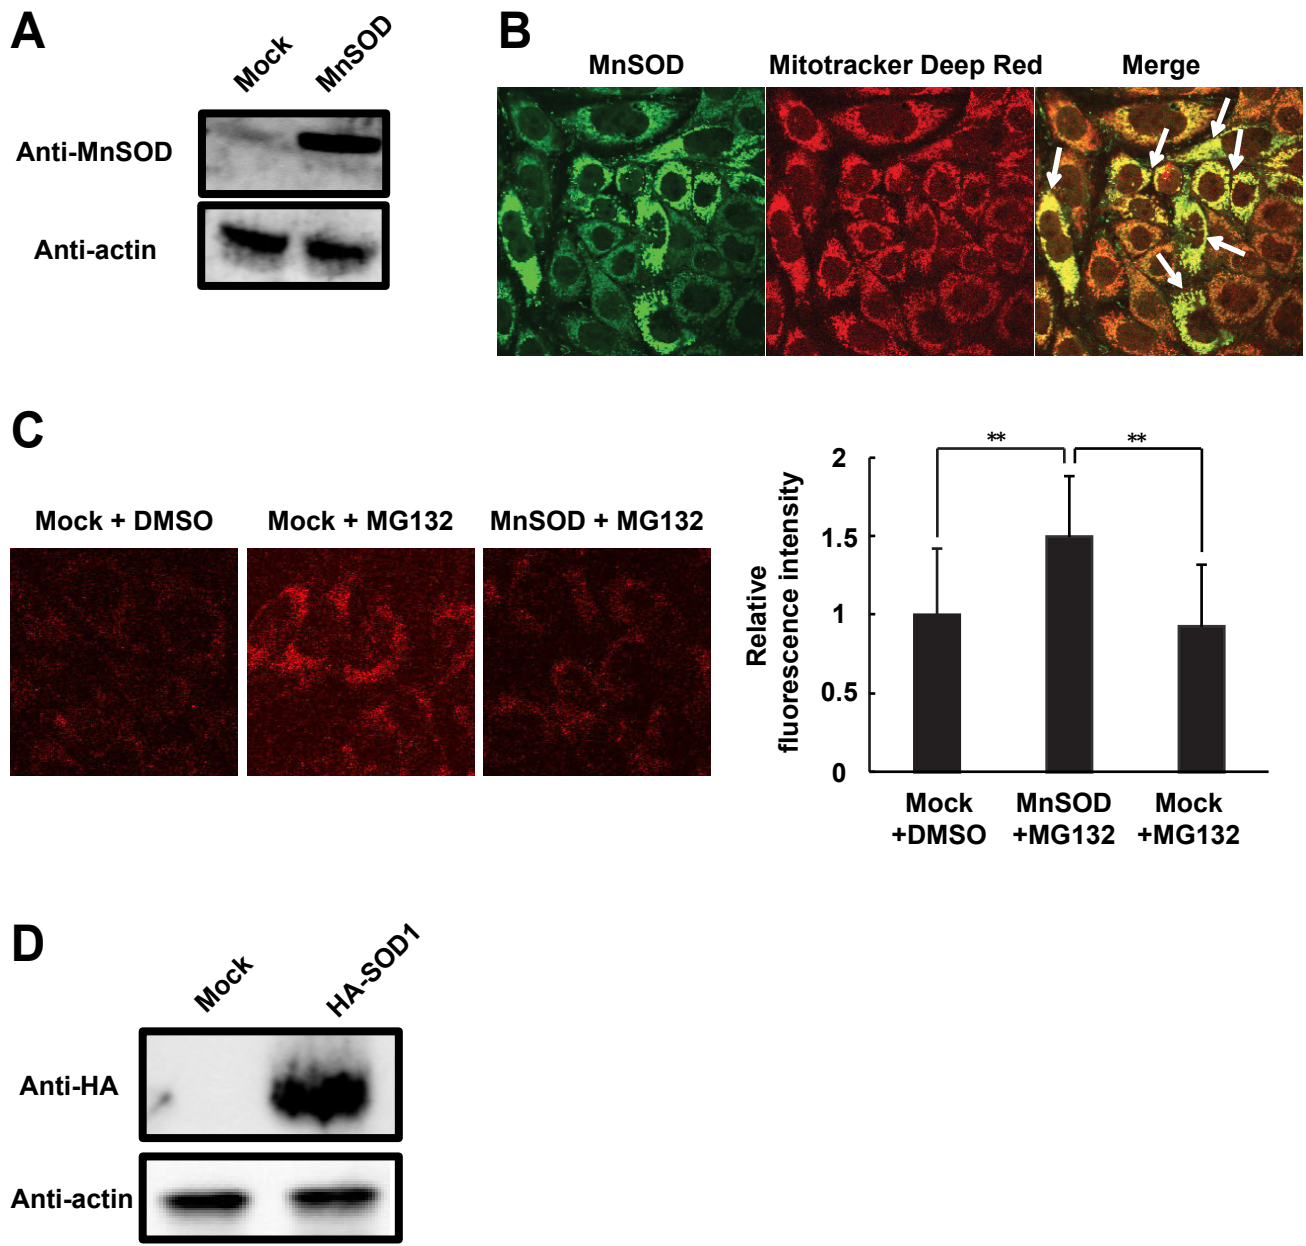

# Figure S6

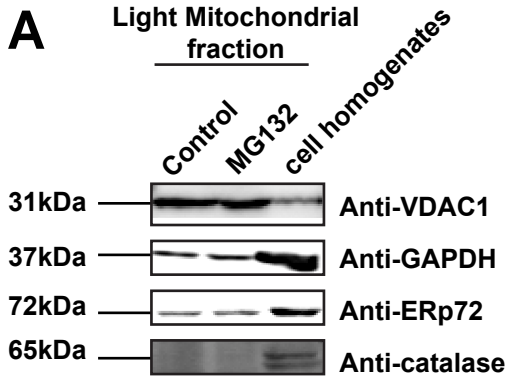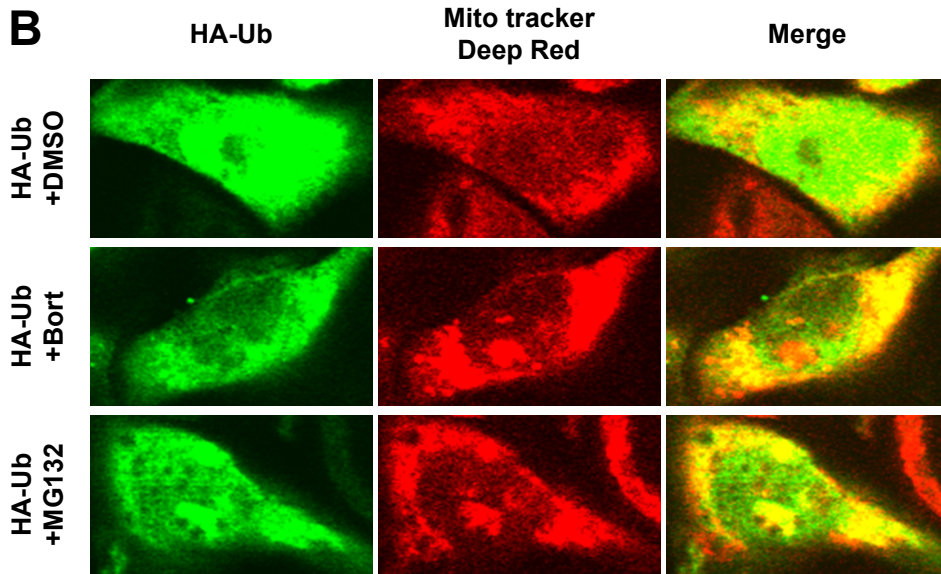

Supplement: srep05896-s1.pdf [file srep05896-s1.pdf]
